# Supplementary material
Source: Springer Nature journal article supplement (https://www.springermedizin.de/resource/supplementary/12967_2007_188_MOESM2_ESM.pdf/9575898)

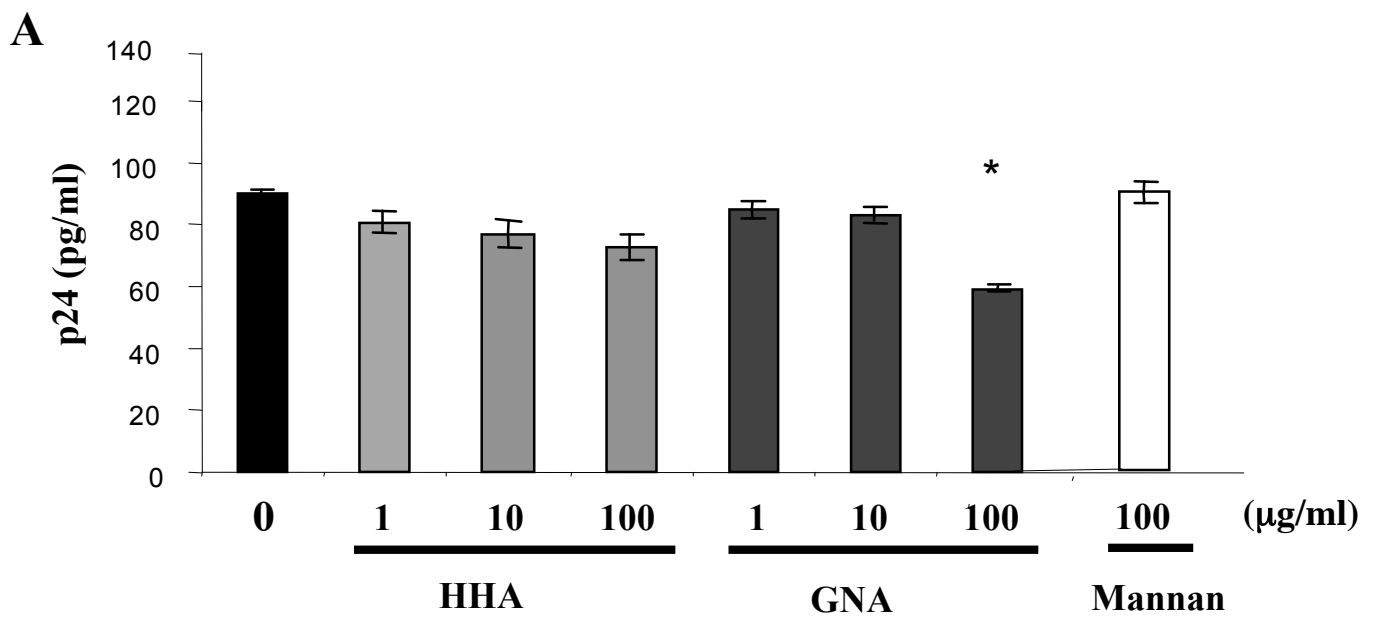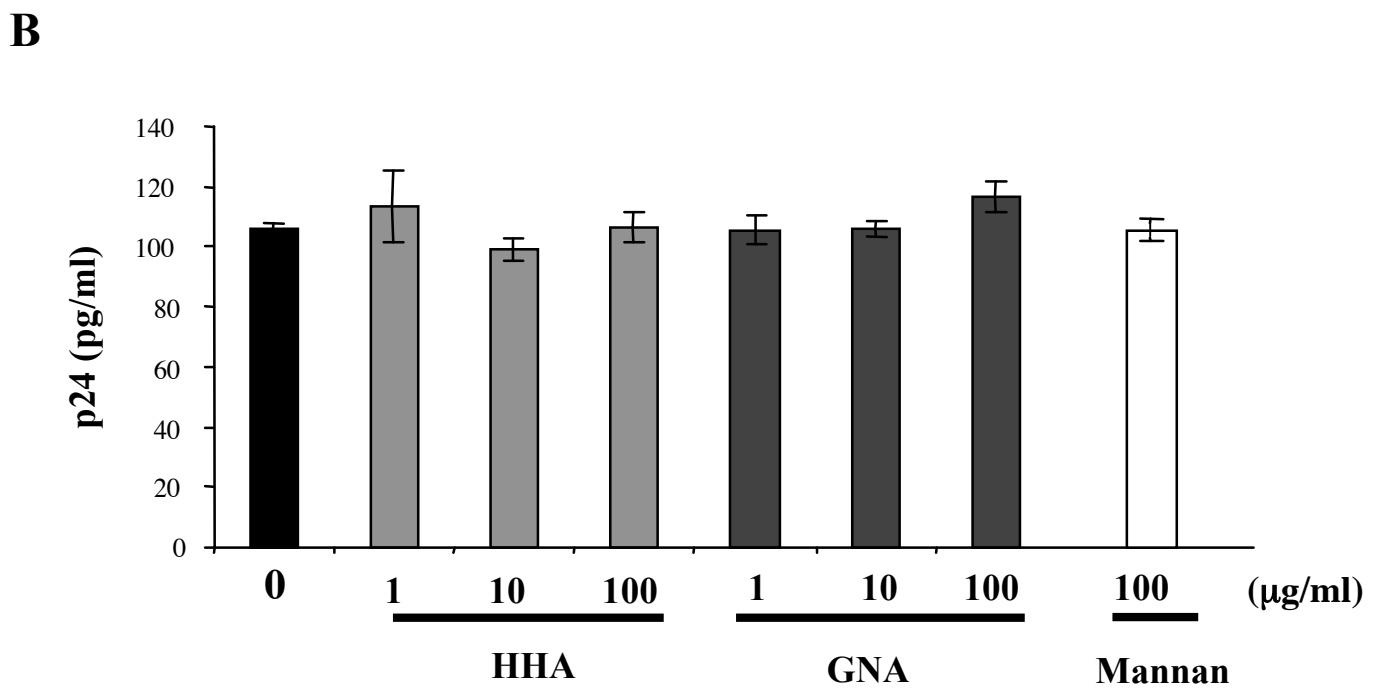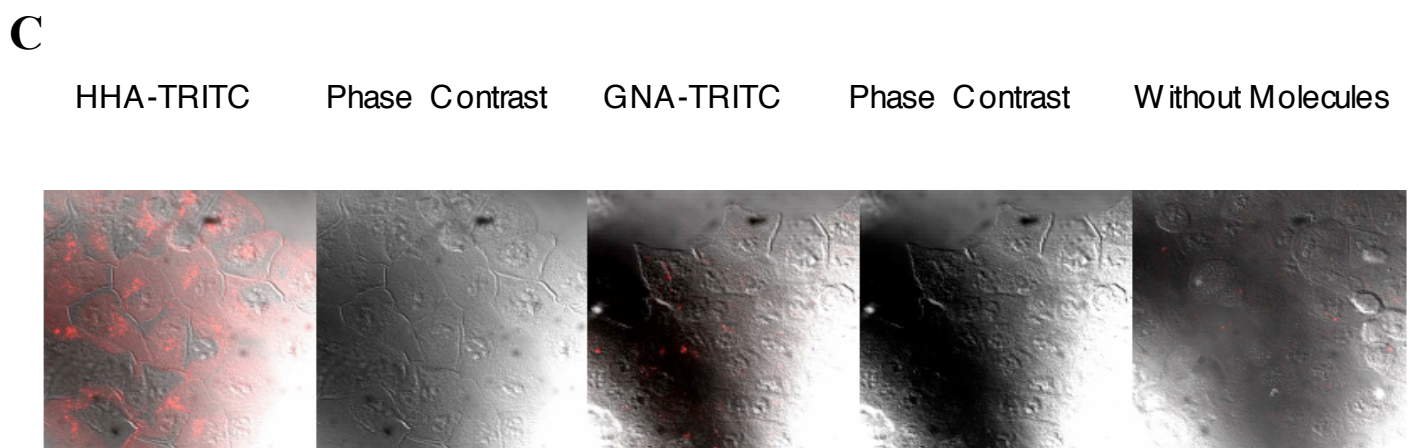

Supplement: MOESM2 [file 9575898]
